# Supplementary material for: Fabrication of flexible microlens arrays through vapor-induced dewetting on selectively plasma-treated surfaces
Source: Royal Society of Chemistry journal article supplement (doi:10.1039/c4tc02944e), 2015-01-01
Supplement: c4tc02944e1.pdf [file c4tc02944e1.pdf]

Electronic supplementary information

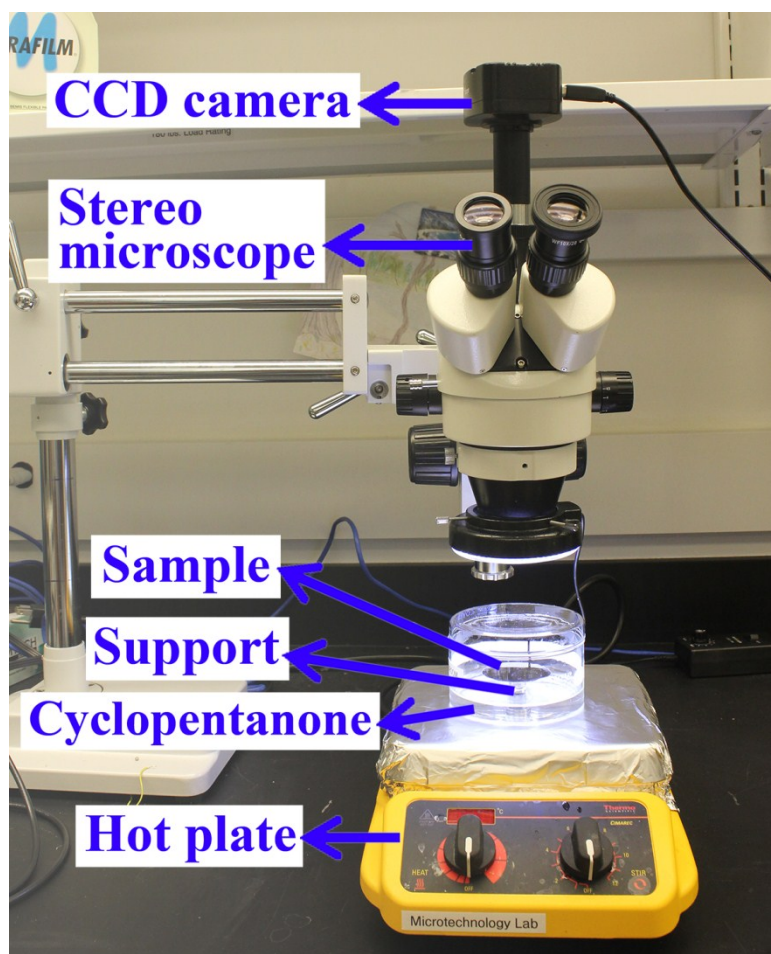

Figure S1. The experimental setup for vapor-induced dewetting.

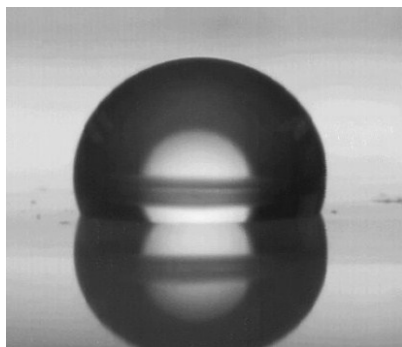

**Figure S2.** A representative WCA image on a PDMS substrate which was in the vapor atmosphere of cyclopentanone during the dewetting process at 80°C. It exhibited a WCA of  $110.1 \pm 1.0^\circ$ , which was very close to that of the pristine PDMS surface ( $109.3 \pm 0.4^\circ$ ).
